# Supplementary material for: Initiation, Continuation, or Withdrawal of Angiotensin‐Converting Enzyme Inhibitors/Angiotensin Receptor Blockers and Outcomes in Patients Hospitalized With Heart Failure With Reduced Ejection Fraction
Source: PubMed Central journal article supplement — J Am Heart Assoc. 2017 Feb 11;6(2):e004675. doi: 10.1161/JAHA.116.004675 (PMC5523765; doi:10.1161/jaha.116.004675), 2017-02-11
Supplement: JAH3-6-e004675-s001.pdf [file JAH3-6-e004675-s001.pdf]

# **SUPPLEMENTAL MATERIAL**

**Table S1. Documented Reasons for ACEi/ARB Contraindication**

| <b>ACEi Contraindication</b>           | <b>N=6753</b> |        |
|----------------------------------------|---------------|--------|
| Hypotension/Risk for Cardiogenic Shock | 588           | 8.71%  |
| Azotemia                               | 1589          | 23.53% |
| Other                                  | 4023          | 59.57% |
| Patient Reason                         | 796           | 11.79% |
| System Reason                          | 58            | 0.86%  |

| <b>ARB Contraindication</b>            | <b>N=6739</b> |        |
|----------------------------------------|---------------|--------|
| Hypotension/Risk for Cardiogenic Shock | 587           | 8.71%  |
| Azotemia                               | 1610          | 23.89% |
| Other                                  | 3983          | 59.10% |
| Patient Reason                         | 765           | 11.35% |
| System Reason                          | 56            | 0.83%  |

**Table S2. Covariates Included in Multivariable Cox Regression**

| <b>Variable Type</b>                 | <b>Covariates</b>                                                                                                                                                                                                                                                                                                                                                                                                                                                                                                                                                                                                                                                              |
|--------------------------------------|--------------------------------------------------------------------------------------------------------------------------------------------------------------------------------------------------------------------------------------------------------------------------------------------------------------------------------------------------------------------------------------------------------------------------------------------------------------------------------------------------------------------------------------------------------------------------------------------------------------------------------------------------------------------------------|
| <b>Demographic</b>                   | Age, sex, race (African American, Hispanic, Asian, other vs. white)                                                                                                                                                                                                                                                                                                                                                                                                                                                                                                                                                                                                            |
| <b>Past Medical History</b>          | Atrial fibrillation/flutter, diabetes, hyperlipidemia, hypertension, history of an implantable defibrillator, cardiac resynchronization therapy, ischemic heart disease (defined as a history of: coronary artery disease, myocardial infarction, percutaneous coronary intervention or coronary artery bypass grafting), number of heart failure hospitalizations during prior year, renal insufficiency, anemia, peripheral vascular disease, depression, chronic obstructive pulmonary disease, prior diagnosis of heart failure, number of heart failure hospitalizations in the prior year, dialysis, stroke, valvular heart disease, smoking status and admission weight |
| <b>Vital Signs</b>                   | Admission heart rate, systolic blood pressure and respiratory rate                                                                                                                                                                                                                                                                                                                                                                                                                                                                                                                                                                                                             |
| <b>Laboratory Values</b>             | Admission sodium, hemoglobin, creatinine, blood urea nitrogen, and estimated glomerular filtration rate, discharge potassium                                                                                                                                                                                                                                                                                                                                                                                                                                                                                                                                                   |
| <b>Heart Failure Characteristics</b> | Ejection fraction (treated as continuous if available, documented moderate/severe dysfunction set to 30% and normal/mild dysfunction set to 50%) and discharge on a beta blocker                                                                                                                                                                                                                                                                                                                                                                                                                                                                                               |
| <b>In-Hospital Procedures</b>        | Cardiac catheterization with or without revascularization, cardiac surgery, mechanical ventilation, dialysis/ultrafiltration and cardioversion                                                                                                                                                                                                                                                                                                                                                                                                                                                                                                                                 |
| <b>Hospital Characteristics</b>      | Teaching status, number of beds, region, rural location and capability of performing percutaneous coronary intervention, cardiac surgery or cardiac transplantation                                                                                                                                                                                                                                                                                                                                                                                                                                                                                                            |

*Multiple imputation was used to handle missing variables. Age and sex were complete variables. Race has 0.5% missing. Weight at admission had 10% missing. Past medical histories had only 1.4% missing. Heart rate and blood pressure had 4% missing. Respiratory rate at admission had 13% missing. In terms of labs, sodium had 17% missing, hemoglobin had 19% missing, creatinine had 11% missing, BUN had 17% missing and eGFR had 20% missing. Procedures had 7% missing. Hospital level variable number of beds and teaching status had <0.5% missing. Capability of PCI, surgery and transplant had 6-7% missing.*

**Table S3. Comparison of Primary Analysis and Sensitivity Analysis using Complete Discharge Data**

|                          |                               | Primary Analysis<br>(from Table 4) |                     | Sensitivity Analysis using<br>Complete Discharge Data<br>(n=4,011) |                     |
|--------------------------|-------------------------------|------------------------------------|---------------------|--------------------------------------------------------------------|---------------------|
| Outcome                  | Groups<br>Compared            | Adjusted HR<br>and 95% CI          | Adjusted<br>P-value | Adjusted HR<br>and 95% CI                                          | Adjusted<br>P-value |
| <b>Mortality Rates</b>   |                               |                                    |                     |                                                                    |                     |
| 30-day mortality         | Started vs.<br>continued      | 1.15 (0.96,<br>1.38)               | 0.134               | 1.02 (0.65,<br>1.60)                                               | 0.925               |
| 30-day mortality         | Discontinued<br>vs. continued | 1.92 (1.32,<br>2.81)               | <0.001              | 2.41 (1.15,<br>5.05)                                               | 0.020               |
| 30-day mortality         | Not started vs.<br>continued  | 1.50 (1.12,<br>2.00)               | 0.006               | 1.48 (0.89,<br>2.47)                                               | 0.131               |
| 90-day mortality         | Started vs.<br>continued      | 1.13 (1.01,<br>1.25)               | 0.026               | 0.97 (0.79,<br>1.19)                                               | 0.759               |
| 90-day mortality         | Discontinued<br>vs. continued | 1.68 (1.31,<br>2.15)               | <0.001              | 1.61 (0.94,<br>2.78)                                               | 0.085               |
| 90-day mortality         | Not started vs.<br>continued  | 1.37 (1.17,<br>1.60)               | 0.000               | 1.51 (1.20,<br>1.88)                                               | <0.001              |
| 1-year mortality         | Started vs.<br>continued      | 1.09 (1.01,<br>1.17)               | 0.019               | 1.01 (0.87,<br>1.16)                                               | 0.915               |
| 1-year mortality         | Discontinued<br>vs. continued | 1.35 (1.13,<br>1.61)               | 0.001               | 1.26 (0.81,<br>1.98)                                               | 0.306               |
| 1-year mortality         | Not started vs.<br>continued  | 1.28 (1.14,<br>1.43)               | <0.001              | 1.30 (1.10,<br>1.52)                                               | 0.002               |
| <b>Readmission Rates</b> |                               |                                    |                     |                                                                    |                     |
| 30-day readmission       | Started vs.<br>continued      | 1.07 (0.98,<br>1.17)               | 0.148               | 1.07 (0.92,<br>1.26)                                               | 0.371               |
| 30-day readmission       | Discontinued<br>vs. continued | 1.40 (1.16,<br>1.71)               | <0.001              | 1.49 (0.91,<br>2.46)                                               | 0.114               |
| 30-day readmission       | Not started vs.<br>continued  | 1.14 (1.01,<br>1.29)               | 0.038               | 1.10 (0.81,<br>1.50)                                               | 0.526               |
| 90-day readmission       | Started vs.<br>continued      | 1.01 (0.94,<br>1.08)               | 0.769               | 0.99 (0.87,<br>1.12)                                               | 0.828               |
| 90-day readmission       | Discontinued<br>vs. continued | 1.18 (0.98,<br>1.41)               | 0.074               | 1.22 (0.81,<br>1.85)                                               | 0.344               |

|                                                    |                            |                   |        |                   |       |
|----------------------------------------------------|----------------------------|-------------------|--------|-------------------|-------|
| 90-day readmission                                 | Not started vs. continued  | 1.09 (1.00, 1.20) | 0.061  | 1.01 (0.81, 1.25) | 0.960 |
| 1-year readmission                                 | Started vs. continued      | 0.98 (0.93, 1.03) | 0.434  | 0.94 (0.85, 1.05) | 0.274 |
| 1-year readmission                                 | Discontinued vs. continued | 1.07 (0.92, 1.25) | 0.353  | 1.18 (0.83, 1.69) | 0.360 |
| 1-year readmission                                 | Not started vs. continued  | 1.01 (0.93, 1.09) | 0.836  | 0.98 (0.81, 1.17) | 0.795 |
|                                                    |                            |                   |        |                   |       |
| <b>Composite Mortality &amp; Readmission Rates</b> |                            |                   |        |                   |       |
| 30-day mortality/readmission                       | Started vs. continued      | 1.08 (0.99, 1.17) | 0.091  | 1.04 (0.91, 1.20) | 0.554 |
| 30-day mortality/readmission                       | Discontinued vs. continued | 1.47 (1.21, 1.79) | <0.001 | 1.74 (1.15, 2.62) | 0.008 |
| 30-day mortality/readmission                       | Not started vs. continued  | 1.20 (1.07, 1.36) | 0.003  | 1.14 (0.87, 1.49) | 0.359 |
| 90-day mortality/readmission                       | Started vs. continued      | 1.02 (0.96, 1.09) | 0.509  | 0.95 (0.85, 1.07) | 0.392 |
| 90-day mortality/readmission                       | Discontinued vs. continued | 1.24 (1.04, 1.49) | 0.020  | 1.40 (1.00, 1.97) | 0.051 |
| 90-day mortality/readmission                       | Not started vs. continued  | 1.18 (1.08, 1.29) | <0.001 | 1.13 (0.95, 1.34) | 0.173 |
| 1-year mortality/readmission                       | Started vs. continued      | 0.99 (0.95, 1.04) | 0.803  | 0.91 (0.83, 1.01) | 0.069 |
| 1-year mortality/readmission                       | Discontinued vs. continued | 1.14 (0.96, 1.34) | 0.130  | 1.37 (1.00, 1.86) | 0.047 |
| 1-year mortality/readmission                       | Not started vs. continued  | 1.12 (1.03, 1.22) | 0.008  | 1.14 (0.98, 1.33) | 0.099 |

**Table S4. Rates of In-Hospital Procedures**

|                                          | <b>Total</b> | <b>Continued</b> | <b>Started</b> | <b>Discontinued</b> | <b>Not Started</b> |
|------------------------------------------|--------------|------------------|----------------|---------------------|--------------------|
| N                                        | 16052        | 9572             | 4963           | 308                 | 1209               |
| % total N                                |              | 59.63%           | 30.92%         | 1.92%               | 7.53%              |
| <b>In Hospital Procedures</b>            |              |                  |                |                     |                    |
| No Procedure (%)                         | 70.06        | 68.44            | 70.84          | 73.45               | 78.92              |
| Cardiac catheterization/ angiography (%) | 11.52        | 10.79            | 15             | 7.59                | 4.72               |
| Cardioversion (%)                        | 1.37         | 1.53             | 1.19           | 0.69                | 0.96               |
| CRT-P or CRT-D (%)                       | 8            | 9.85             | 4.98           | 6.9                 | 5.42               |
| Pacemaker (%)                            | 0.87         | 0.95             | 0.68           | 0.34                | 1.14               |
| ICD only (%)                             | 6.72         | 8.02             | 3.9            | 11.03               | 6.39               |
| CABG (%)                                 | 0.32         | 0.21             | 0.36           | 1.03                | 0.79               |
| Cardiac valve surgery (%)                | 0.15         | 0.1              | 0.2            | 0.34                | 0.26               |
| CABG or cardiac valve surgery (%)        | 0.4          | 0.27             | 0.52           | 1.03                | 0.87               |
| Dialysis (%)                             | 1.54         | 1.44             | 1.55           | 1.72                | 2.27               |
| Dialysis or ultrafiltration (%)          | 2.43         | 2.17             | 2.54           | 2.76                | 3.94               |
| ABP (%)                                  | 0.08         | 0.07             | 0.09           | 0.34                | 0.09               |
| Mechanical ventilation (%)               | 1.43         | 1.29             | 1.89           | 1.03                | 0.87               |
| PCI or PCI with stent (%)                | 1.88         | 2.05             | 1.91           | 0.69                | 0.7                |
| Stress testing (%)                       | 3.22         | 3.03             | 4.19           | 1.03                | 1.57               |
| Right Heart Cardiac Catheterization (%)  | 2.65         | 2.52             | 3.38           | 1.72                | 1.14               |

*CRT-D: cardiac resynchronization therapy + defibrillator, CRT-P: cardiac resynchronization therapy + pacemaker, ICD: implantable cardiac defibrillator, CABG: Coronary artery bypass grafting, LVAD: Left ventricular assist device, IABP: Intra-aortic balloon pump, PCI: percutaneous coronary intervention*

**Table S5. Multivariate Cox Proportional Hazard Model Comparing Mortality, Readmission and Composite Mortality and Readmissions between Patients Discontinued from and Not Started on ACEi/ARB**

| <b>Outcome</b>                              | <b>Groups Compared</b>       | <b>Adjusted HR and 95% CI</b> | <b>Adjusted P-value</b> |
|---------------------------------------------|------------------------------|-------------------------------|-------------------------|
| 30-day mortality                            | Discontinued vs. Not Started | 1.37 (0.83, 2.24)             | 0.218                   |
| 30-day readmission                          | Discontinued vs. Not Started | 1.17 (0.96, 1.44)             | 0.115                   |
| 30-day composite (mortality or readmission) | Discontinued vs. Not Started | 1.21 (1.00, 1.46)             | 0.056                   |
| 90-day mortality                            | Discontinued vs. Not Started | 1.27 (0.95, 1.69)             | 0.104                   |
| 90-day readmission                          | Discontinued vs. Not Started | 1.07 (0.89, 1.29)             | 0.449                   |
| 90-day composite (mortality or readmission) | Discontinued vs. Not Started | 1.07 (0.89, 1.28)             | 0.459                   |
| 1-year mortality                            | Discontinued vs. Not Started | 1.07 (0.88, 1.30)             | 0.513                   |
| 1-year readmission                          | Discontinued vs. Not Started | 1.05 (0.91, 1.20)             | 0.539                   |
| 1-year composite (mortality or readmission) | Discontinued vs. Not Started | 1.02 (0.88, 1.19)             | 0.794                   |

**Table S6. Comparison of Baseline Characteristics between Patients Excluded due to Missing Data and those Included in the Study Population**

|                                                               | <b>Included Study Population</b> | <b>Excluded due to Missing Data</b> | <b>Standardized Differences*</b> |
|---------------------------------------------------------------|----------------------------------|-------------------------------------|----------------------------------|
| N                                                             | 16052                            | 15727                               |                                  |
| <b>Demographics</b>                                           |                                  |                                     |                                  |
| Age                                                           | 78.34 ± 7.92                     | 79.01 ± 8.25                        | 8.3                              |
| Sex (% female)                                                | 41.85                            | 41.74                               | 0.21                             |
| Race (% white)                                                | 77.97                            | 75.56                               | 5.11                             |
| Body Mass Index (BMI)                                         | 27.65 ± 6.83                     | 26.96 ± 6.57                        | 10.29                            |
| <b>Past Medical History</b>                                   |                                  |                                     |                                  |
| Atrial Fibrillation/Flutter (%)                               | 36.19                            | 39.98                               | 7.82                             |
| Diabetes - Insulin Treated (%)                                | 16.8                             | 17.54                               | 1.96                             |
| Diabetes - Non-insulin Treated (%)                            | 24.85                            | 22.25                               | 6.13                             |
| Hyperlipidemia (%)                                            | 51.18                            | 48.4                                | 5.55                             |
| Hypertension (%)                                              | 76.51                            | 71.02                               | 12.49                            |
| ICD (%)                                                       | 14.90                            | 17.49                               | 7.01                             |
| Ischemic Heart Disease (%)                                    | 67.09                            | 67.19                               | 0.21                             |
| PVD (%)                                                       | 13.51                            | 13.85                               | 0.97                             |
| Renal Insufficiency (%)                                       | 14.63                            | 24.27                               | 24.54                            |
| Smoking (%)                                                   | 12.05                            | 10.87                               | 2.49                             |
| Stroke (%)                                                    | 15.72                            | 16.29                               | 1.56                             |
| <b>Heart Failure Characteristics</b>                          |                                  |                                     |                                  |
| History of HF                                                 | 62.38                            | 70.3                                | 20.2                             |
| Ejection fraction (%)                                         | 25.39 ± 7.46                     | 25.41 ± 7.56                        | 14.96                            |
| Number of hospital admission in 1 year prior to admission (n) |                                  |                                     |                                  |
| >2 (%)                                                        | 3.20                             | 7.97                                | 22.05                            |
| 2 (%)                                                         | 4.79                             | 9.30                                |                                  |
| 1 (%)                                                         | 16.99                            | 22.35                               |                                  |
| 0 (%)                                                         | 75.01                            | 60.37                               |                                  |



|                                   |                      |                      |       |
|-----------------------------------|----------------------|----------------------|-------|
| <b>Vital Signs (at admission)</b> |                      |                      |       |
| Heart rate (bmp)                  | 85.30 ± 19.91        | 85.90 ± 19.98        | 3.02  |
| Systolic blood pressure (mmHg)    | 137.67 ± 26.86       | 129.44 ± 27.17       | 30.45 |
|                                   |                      |                      |       |
| <b>Vital signs (at discharge)</b> |                      |                      |       |
| Heart rate (bmp)                  | 74.77 ±12.81         | 77.09 ± 14.34        | 17.05 |
| Systolic blood pressure (mmHg)    | 119.82 ± 19.29       | 116.86 ± 19.43       | 15.17 |
|                                   |                      |                      |       |
| <b>Labs (at admission)</b>        |                      |                      |       |
| BNP (pg/ml)                       | 1078 (552, 2010)     | 1385 (718, 2556)     | 20.42 |
| NT-proBNP (pg/ml)                 | 7315 (3284, 15310)   | 11154 (5535, 25000)  | 34.45 |
| Creatinine (mg/dl)                | 1.3 (1.0, 1.6)       | 1.4 (1.1, 1.9)       | 14.78 |
| eGFR                              | 52.65 (38.68, 69.40) | 46.94 (32.63, 63.72) | 1.77  |
|                                   |                      |                      |       |
| <b>Labs (at discharge)</b>        |                      |                      |       |
| Potassium (mEq/L)                 | 4.1 (3.8, 4.4)       | 4.1 (3.7, 4.5)       | 2.99  |
| BNP (pg/ml)                       | 706 (348, 1417)      | 1088 (519, 2187)     | 34.47 |
| NT-proBNP (pg/ml)                 | 5419 (2787, 12019)   | 9995 (5178, 16498)   | 43.95 |
| Creatinine (mg/dl)                | 1.3 (1.0, 1.7)       | 1.5 (1.1, 2.1)       | 15.8  |

\* A standardized difference greater than 10% is typically considered meaningful<sup>l</sup>

**Figure S1. Study Population Derivation**

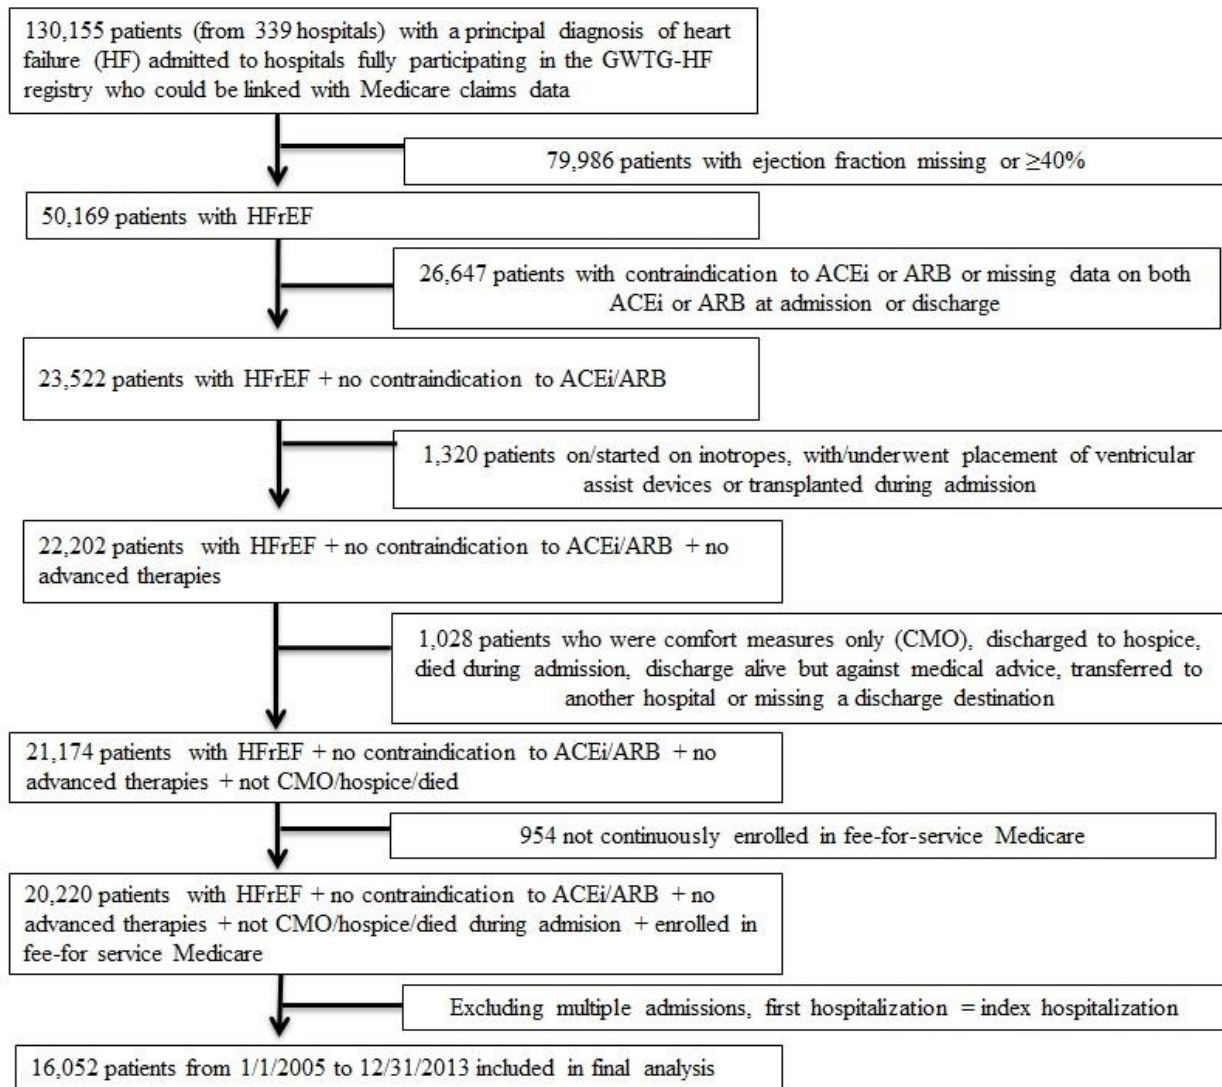

### **Supplemental Reference:**

1. Mamdani M, Sykora K, Li P, Normand SL, Streiner DL, Austin PC, Rochon PA, Anderson GM. Reader's guide to critical appraisal of cohort studies: Assessing potential for confounding. *BMJ*. 2005;330:960-2.
